# Supplementary figures and images for: Morphological and Genetic Characterization of Maize Landraces Adapted to Marginal Hills in North-West Italy
Source: MDPI journal article supplement (doi:10.3390/plants13071030), 2024-04-05

- Va219
- Va220W
- Va221
- Va222
- Va223
- Va224
- Va225
- Va226
- Va227
- Va228
- Va229
- Va230
- Va231

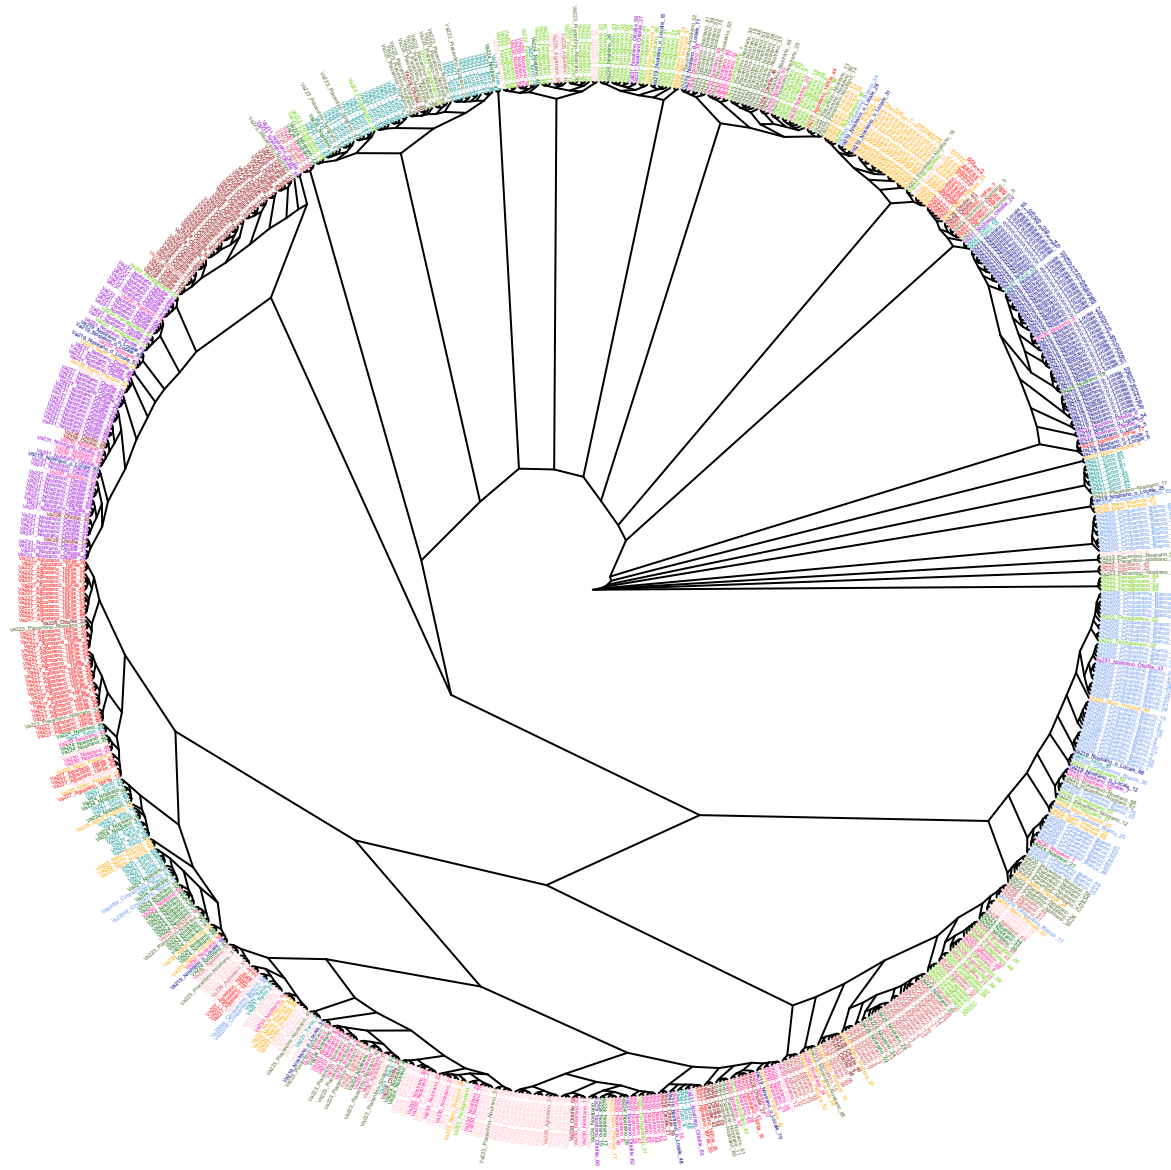

Supplement: s1 [file s1]
